# Supplementary material for: A New Approach for Studying Bond Rupture/Closure of a Spiro Benzopyran Photochromic Material: Reactivity Descriptors Derived from Frontier Orbitals and DFT Computed Electrostatic Potential Energy Surface Maps
Source: Hindawi journal article supplement (doi:10.1155/2016/6765805), 2016-01-01
Supplement: f1 [file 6765805.f1.zip]

Archive with 2 entries (2 files):
- Table 1_SP_Cspiro-O COMPARISON.xlsx
- Table 2_Isomers_Geometries_Mulliken.xlsx
