# Supplementary material for: A New Approach for Studying Bond Rupture/Closure of a Spiro Benzopyran Photochromic Material: Reactivity Descriptors Derived from Frontier Orbitals and DFT Computed Electrostatic Potential Energy Surface Maps
Source: Hindawi journal article supplement (doi:10.1155/2016/6765805), 2016-01-01
Supplement: f1 [file 6765805.f1.zip › Table 1_SP_Cspiro-O COMPARISON.xlsx]

## Sheet: Sheet1
TD-DFT Computed Molecular geometry parameters and Mulliken Charges of the closed benzospiropyran (SP) form in different media
		SP closed form in gaseous phase								SP closed form in Toluene					SP closed form-in Ethanol					SP closed form in Water
Tag	Atom	NA	NB	NC	Bond	Angle	Dihedral	Mulliken Charge		﻿Bond	Angle	Dihedral	Mulliken Charge		﻿Bond	Angle	Dihedral	Mulliken Charge		Bond	Angle	Dihedral	Mulliken Charge
1	C							-0.237106					-0.233995					-0.233604					-0.233572
2	C	1			1.36783			0.0644683		1.38244			0.0657703		1.3829			0.0673882		1.38294			0.0675242
3	C	1	2		1.39682	119.382		-0.193439		1.40809	119.298		-0.193913		1.40861	119.286		-0.193914		1.40865	119.285		-0.193909
4	C	2	1	3	1.52058	130.736	-175.372	-0.225657		1.52737	130.396	-175.299	-0.222821		1.52724	130.291	-175.506	-0.224386		1.52724	130.283	-175.527	-0.224495
5	C	2	1	3	1.39681	120.459	-0.463994	0.405907		1.4119	120.58	-0.917798	0.3883		1.41192	120.606	-0.942269	0.387151		1.41192	120.608	-0.942775	0.386964
6	C	3	1	2	1.37849	119.823	0.530467	-0.18424		1.39507	119.904	0.652907	-0.183754		1.39569	119.898	0.606953	-0.183736		1.39574	119.898	0.602012	-0.183734
7	C	4	2	1	1.57073	100.586	-164.077	0.402302		1.58635	100.91	-165.854	0.375887		1.58808	101.002	-166.462	0.375614		1.5882	101.008	-166.502	0.375595
8	C	4	2	1	1.53301	114.867	-41.9186	-0.528342		1.53701	114.845	-44.1165	-0.520822		1.53754	114.701	-44.7079	-0.520086		1.53758	114.689	-44.751	-0.520031
9	C	4	2	1	1.54323	108.061	81.8333	-0.482275		1.55018	108.089	79.6952	-0.477128		1.55003	108.106	78.8647	-0.476402		1.55002	108.109	78.8067	-0.476356
10	C	5	2	1	1.37722	120.808	0.351289	-0.205262		1.39455	120.61	0.884223	-0.208097		1.39524	120.601	0.956286	-0.20807		1.39529	120.602	0.961363	-0.208076
11	N	5	2	1	1.3891	110.062	179.328	-0.719069		1.39647	110.297	-179.615	-0.693338		1.39629	110.381	-179.452	-0.692457		1.39633	110.386	-179.438	-0.692279
12	C	7	4	2	1.50942	113.429	90.4406	-0.151567		1.5066	114.07	92.6308	-0.15495		1.5059	114.081	93.8896	-0.156683		1.50585	114.079	93.9854	-0.15686
13	O	7	4	2	1.44074	110.402	-143.88	-0.602294		1.47744	109.282	-140.925	-0.56843		1.48023	109.195	-139.816	-0.566889		1.48045	109.19	-139.734	-0.566773
14	C	11	5	2	1.451	124.976	-172.864	-0.384405		1.46454	124.204	-168.704	-0.384087		1.46664	123.964	-167.791	-0.385086		1.46683	123.941	-167.694	-0.385195
15	C	12	7	4	1.31826	123.518	121.755	-0.136109		1.33824	123.854	125.555	-0.141686		1.33827	123.906	125.331	-0.141266		1.33827	123.91	125.294	-0.141219
16	C	13	7	4	1.35765	124.62	-119.621	0.347449		1.37309	122.607	-126.009	0.336101		1.37234	122.634	-126.232	0.33701		1.37225	122.636	-126.22	0.337109
17	C	16	13	7	1.38044	121.844	-6.18455	-0.0340594		1.40181	122.876	-2.10923	-0.0366276		1.40208	122.841	-1.5993	-0.0372508		1.40211	122.839	-1.57924	-0.0372997
18	C	16	13	7	1.40021	117.388	174.138	0.339116		1.41819	116.41	178.164	0.323823		1.419	116.395	178.696	0.324562		1.41908	116.394	178.72	0.32462
19	C	17	16	13	1.38604	120.025	-179.3	-0.199873		1.39736	119.831	-179.369	-0.196033		1.3969	119.813	-179.488	-0.195556		1.39686	119.812	-179.494	-0.195517
20	C	18	16	13	1.36999	118.752	179.388	-0.205137		1.38531	118.685	179.497	-0.204704		1.3852	118.665	179.616	-0.204552		1.38519	118.664	179.621	-0.204536
21	O	18	16	13	1.36107	116.352	-0.874118	-0.567028		1.3747	115.757	-0.710221	-0.543182		1.37381	115.755	-0.542126	-0.542954		1.37375	115.753	-0.532225	-0.542939
22	C	19	17	16	1.36826	118.714	-0.175572	0.323514		1.38485	118.896	-0.186569	0.310353		1.38593	118.896	-0.144941	0.312315		1.38603	118.897	-0.141031	0.312472
23	C	21	18	16	1.4396	120.461	179.407	-0.334792		1.46707	117.488	-179.848	-0.34389		1.47005	117.546	-179.832	-0.345282		1.47026	117.551	-179.827	-0.345377
24	H	1	2	5	1.07268	120.654	179.554	0.178147		1.08464	120.575	179.436	0.179155		1.08464	120.578	179.45	0.179163		1.08464	120.579	179.453	0.179168
25	H	3	1	2	1.07131	119.946	-179.478	0.177325		1.08324	119.944	-179.15	0.178298		1.08332	119.937	-179.139	0.178361		1.08333	119.936	-179.138	0.17837
26	H	6	3	1	1.07233	119.765	-179.99	0.182532		1.08427	119.744	-179.84	0.183441		1.08434	119.759	-179.779	0.183477		1.08435	119.76	-179.772	0.183484
27	H	8	4	2	1.08445	110.31	-173.474	0.198487		1.09562	110.164	-175.709	0.197057		1.09553	110.177	-175.714	0.1972		1.09552	110.18	-175.708	0.197212
28	H	8	4	2	1.08416	109.516	67.9052	0.195841		1.09557	109.378	65.4931	0.193802		1.09551	109.337	65.4795	0.193874		1.0955	109.334	65.4842	0.193878
29	H	8	4	2	1.08167	111.987	-52.2193	0.198536		1.09321	111.767	-54.5435	0.195328		1.09318	111.757	-54.5251	0.195012		1.09318	111.755	-54.5183	0.19499
30	H	9	4	2	1.0811	110.943	176.111	0.200413		1.09274	110.649	175.536	0.199154		1.0928	110.63	175.966	0.198473		1.0928	110.63	175.99	0.198422
31	H	9	4	2	1.08059	110.337	56.0238	0.211318		1.09279	110.203	55.3997	0.210824		1.09304	110.313	55.6642	0.211202		1.09307	110.32	55.6762	0.211238
32	H	9	4	2	1.08376	108.838	-63.5117	0.185273		1.09464	108.714	-64.158	0.182629		1.09459	108.677	-63.9327	0.182675		1.09459	108.674	-63.9235	0.182676
33	H	10	5	2	1.07056	121.297	179.343	0.177985		1.08269	121.24	179.06	0.178852		1.08269	121.244	178.982	0.178885		1.08269	121.245	178.974	0.178892
34	H	12	7	4	1.07126	114.526	-59.5568	0.213915		1.08371	114.275	-56.6412	0.215873		1.08361	114.362	-56.8016	0.21549		1.08361	114.369	-56.8288	0.215463
35	H	14	11	5	1.07965	108.362	-167.437	0.22297		1.09191	108.174	-168.751	0.221725		1.09185	108.263	-169.16	0.221744		1.09185	108.268	-169.184	0.22175
36	H	14	11	5	1.08239	109.381	-49.9944	0.214203		1.09395	109.089	-51.3945	0.213603		1.09373	109.119	-51.7086	0.213914		1.09371	109.119	-51.7252	0.21394
37	H	14	11	5	1.08739	112.951	71.3446	0.194439		1.09883	113.146	69.9825	0.193798		1.09827	113.021	69.5982	0.194308		1.09823	113.012	69.5767	0.194341
38	H	15	12	7	1.07241	121.283	178.665	0.201594		1.08443	121.073	177.787	0.20323		1.08422	121.029	177.908	0.203415		1.08421	121.025	177.923	0.203431
39	H	19	17	16	1.06751	121.445	179.834	0.223956		1.07972	121.702	179.839	0.226371		1.07963	121.542	179.843	0.226333		1.07963	121.529	179.844	0.226329
40	H	20	18	16	1.06514	121.929	179.896	0.232428		1.07772	122.387	179.929	0.234035		1.07767	122.21	179.916	0.233871		1.07767	122.195	179.916	0.233859
41	H	23	21	18	1.08279	111.175	61.5428	0.206125		1.09553	111.218	61.2003	0.207122		1.09496	111.097	61.2575	0.207728		1.09492	111.089	61.2571	0.207768
42	H	23	21	18	1.08278	111.165	-60.7596	0.206127		1.09546	111.203	-61.1927	0.206989		1.09488	111.086	-61.1493	0.207566		1.09485	111.079	-61.1506	0.207606
43	H	23	21	18	1.07667	105.247	-179.61	0.23181		1.08918	104.757	-179.99	0.230369		1.08901	104.777	-179.943	0.230691		1.089	104.779	-179.944	0.230713
44	N	22	19	17	1.44077	119.507	-179.972	0.0852262		1.44966	119.486	-179.961	0.0519422		1.44651	119.448	-179.956	0.0475931		1.44626	119.447	-179.956	0.0472295
45	O	44	22	19	1.24639	117.645	179.937	-0.316334		1.28861	117.617	179.947	-0.299188		1.28968	117.819	-179.98	-0.299435		1.28978	117.836	-179.975	-0.299453
46	O	44	22	19	1.24554	117.581	-0.0796194	-0.314419		1.28785	117.592	-0.0764188	-0.297186		1.28928	117.791	-0.0014221	-0.297406		1.2894	117.808	0.0061248	-0.297423
