# Supplementary material for: A New Approach for Studying Bond Rupture/Closure of a Spiro Benzopyran Photochromic Material: Reactivity Descriptors Derived from Frontier Orbitals and DFT Computed Electrostatic Potential Energy Surface Maps
Source: Hindawi journal article supplement (doi:10.1155/2016/6765805), 2016-01-01
Supplement: f1 [file 6765805.f1.zip › Table 2_Isomers_Geometries_Mulliken.xlsx]

## Sheet: Sheet1
						CCC					CTT					TTT
Tag	Atom	NA	NB	NC		Bond	Angle	Dihedral	Mulliken Charge		Bond	Angle	Dihedral	Mulliken Charge		Bond	Angle	Dihedral	Mulliken Charge
1	C								0.163614					0.312382					0.516552
2	N	1				1.45807			-0.621321		1.45807			-0.659215		1.37272			-0.819059
3	C	1	2			1.3552	121.846		-0.159388		1.3552	121.846		-0.209559		1.38254	121.525		-0.310387
4	C	1	2	3		1.57439	121.853	179.683	-0.0950643		1.57439	121.853	179.683	0.0058142		1.5444	108.378	-179.988	-0.327681
5	C	2	1	3		1.42145	100.356	-154.679	0.29577		1.42145	100.356	-154.679	0.278268		1.41561	111.916	179.928	0.392222
6	C	2	1	3		1.47	114.036	-33.4473	-0.486055		1.47	114.036	-33.4473	-0.436177		1.47193	123.389	-0.215139	-0.395497
7	C	3	1	2		1.54	154.646	0.158463	-0.112795		1.54	120	-179.842	-0.36562		1.3995	125.865	179.718	-0.158418
8	C	5	2	1		1.33098	111.042	-15.5337	-0.0793572		1.33098	111.042	-15.5337	-0.0914938		1.40251	108.733	0.0457559	0.0936857
9	C	4	1	2		1.54	85.6206	12.5097	-0.74547		1.54	85.6206	12.5097	-0.847401		1.55155	111.264	117.066	-0.503288
10	C	4	1	2		1.54	136.808	85.6573	-0.622962		1.54	136.808	85.6573	-0.632614		1.5517	111.284	-116.967	-0.503543
11	C	5	2	1		1.53323	126.422	163.582	-0.191173		1.53323	126.422	163.582	-0.192705		1.39064	129.679	-179.941	-0.202157
12	C	7	3	1		1.3552	143.026	-0.0003363	-0.13829		1.3552	120	180	-0.076552		1.40146	126.265	-179.962	-0.0483243
13	C	8	5	2		1.53783	119.441	-179.282	-0.27366		1.53783	119.441	-179.282	-0.288888		1.38471	120.244	179.955	-0.224791
14	C	11	5	2		1.3573	118.486	179.679	-0.191315		1.3573	118.486	179.679	-0.192245		1.40046	117.816	-179.971	-0.180286
15	C	12	7	3		1.5344	120.873	0	-0.229569		1.5344	120.873	-0.0002948	-0.207057		1.42128	117.887	178.878	-0.180197
16	C	12	7	3		1.52817	120.873	180	0.394479		1.52817	120.873	180	0.381765		1.48189	122.116	-0.310221	0.362179
17	C	14	11	5		1.36181	119.348	-0.782062	-0.193676		1.36181	119.348	-0.782062	-0.192689		1.39689	121.077	-0.0123696	-0.183304
18	C	15	12	7		1.36141	120.087	-180	0.298605		1.36141	120.087	-180	0.2968		1.36398	120.607	-179.686	0.303954
19	C	16	12	7		1.5344	118.255	180	0.254924		1.5344	118.255	180	0.258636		1.47341	115.619	-179.613	0.30336
20	O	16	12	7		1.2584	120.873	0	-0.492737		1.2584	120.873	0	-0.526088		1.26863	122.967	0.583194	-0.534105
21	C	19	16	12		1.36141	120.087	-0.0002791	-0.207361		1.36141	120.087	-0.0002797	-0.210937		1.36127	121.431	-0.884398	-0.196945
22	O	19	16	12		1.43	119.956	180	-0.516181		1.43	119.956	180	-0.516518		1.38664	120.868	-176.979	-0.541972
23	C	22	19	16		1.43	109.471	-30.0001	-0.379545		1.43	109.471	-30.0001	-0.377404		1.4794	118.086	-48.5089	-0.35638
24	H	3	1	2		1.07	85.3545	-179.842	0.147737		1.07	120	0.158435	0.223439		1.08245	119.468	-0.0564675	0.251928
25	H	6	2	1		1.07	109.471	63.0734	0.288318		1.07	109.471	63.0734	0.228794		1.09421	110.199	60.9023	0.244294
26	H	6	2	1		1.07	109.471	-176.927	0.236174		1.07	109.471	-176.927	0.230899		1.0892	108.976	-179.101	0.225458
27	H	6	2	1		1.07	109.471	-56.9266	0.213355		1.07	109.471	-56.9266	0.216336		1.09408	110.101	-59.1705	0.246899
28	H	7	3	1		1.07	96.9742	180	0.222488		1.07	120	0	0.253872		1.08664	118.695	0.0234335	0.198721
29	H	9	4	1		1.07	109.471	173.317	0.257211		1.07	109.471	173.317	0.315583		1.09504	109.227	-173.81	0.201012
30	H	9	4	1		1.07	109.471	-66.6831	0.329831		1.07	109.471	-66.6831	0.394651		1.09347	110.289	-54.4107	0.211353
31	H	9	4	1		1.07	109.471	53.3169	0.304762		1.07	109.471	53.3169	0.384979		1.09289	111.103	66.325	0.208369
32	H	10	4	1		1.07	109.471	-59.5631	0.225249		1.07	109.471	-59.5631	0.204043		1.09286	111.099	-65.9793	0.208758
33	H	10	4	1		1.07	109.471	-179.563	0.277849		1.07	109.471	-179.563	0.267315		1.09518	109.29	174.143	0.200888
34	H	10	4	1		1.07	109.471	60.4369	0.344567		1.07	109.471	60.4369	0.351016		1.09347	110.296	54.7232	0.212098
35	H	11	5	2		1.07	120.757	-0.227476	0.212717		1.07	120.757	-0.227476	0.20102		1.08205	121.915	0.0478872	0.196148
36	H	13	8	5		1.07	120.326	179.315	0.232637		1.07	120.326	179.315	0.230465		1.08406	120.79	-179.94	0.193308
37	H	14	11	5		1.07	120.07	-179.762	0.202238		1.07	120.07	-179.762	0.198512		1.08336	119.15	179.981	0.20002
38	H	15	12	7		1.07	119.956	0	0.260237		1.07	119.956	0	0.225795		1.08146	121.054	-0.007975	0.217112
39	H	17	14	11		1.07	119.841	179.812	0.199389		1.07	119.841	179.812	0.195856		1.08293	119.852	179.981	0.196591
40	H	21	19	16		1.07	119.171	-180	0.242271		1.07	119.171	-180	0.241873		1.07848	120.478	-179.556	0.237869
41	H	23	22	19		1.07	109.471	-180	0.192487		1.07	109.471	-180	0.192096		1.09064	104.486	178.024	0.203221
42	H	23	22	19		1.07	109.471	-60	0.184283		1.07	109.471	-60	0.182585		1.097	110.459	-64.15	0.183935
43	H	23	22	19		1.07	109.471	60	0.267602		1.07	109.471	60	0.264763		1.08731	110.207	57.9833	0.230076
44	N	18	15	12		1.47	119.171	180	0.129265		1.47	119.171	180	0.131897		1.44526	119.464	-179.903	0.0426245
45	O	44	18	15		1.2376	120	-180	-0.311893		1.2376	120	-180	-0.315445		1.28911	117.288	179.653	-0.301882
46	O	44	18	15		1.2376	120	0	-0.330247		1.2376	120	0	-0.330846		1.2913	117.749	-0.247724	-0.31442
